# Supplementary material
Source: PubMed Central journal article supplement (PMC7993025)

**Figure S1**

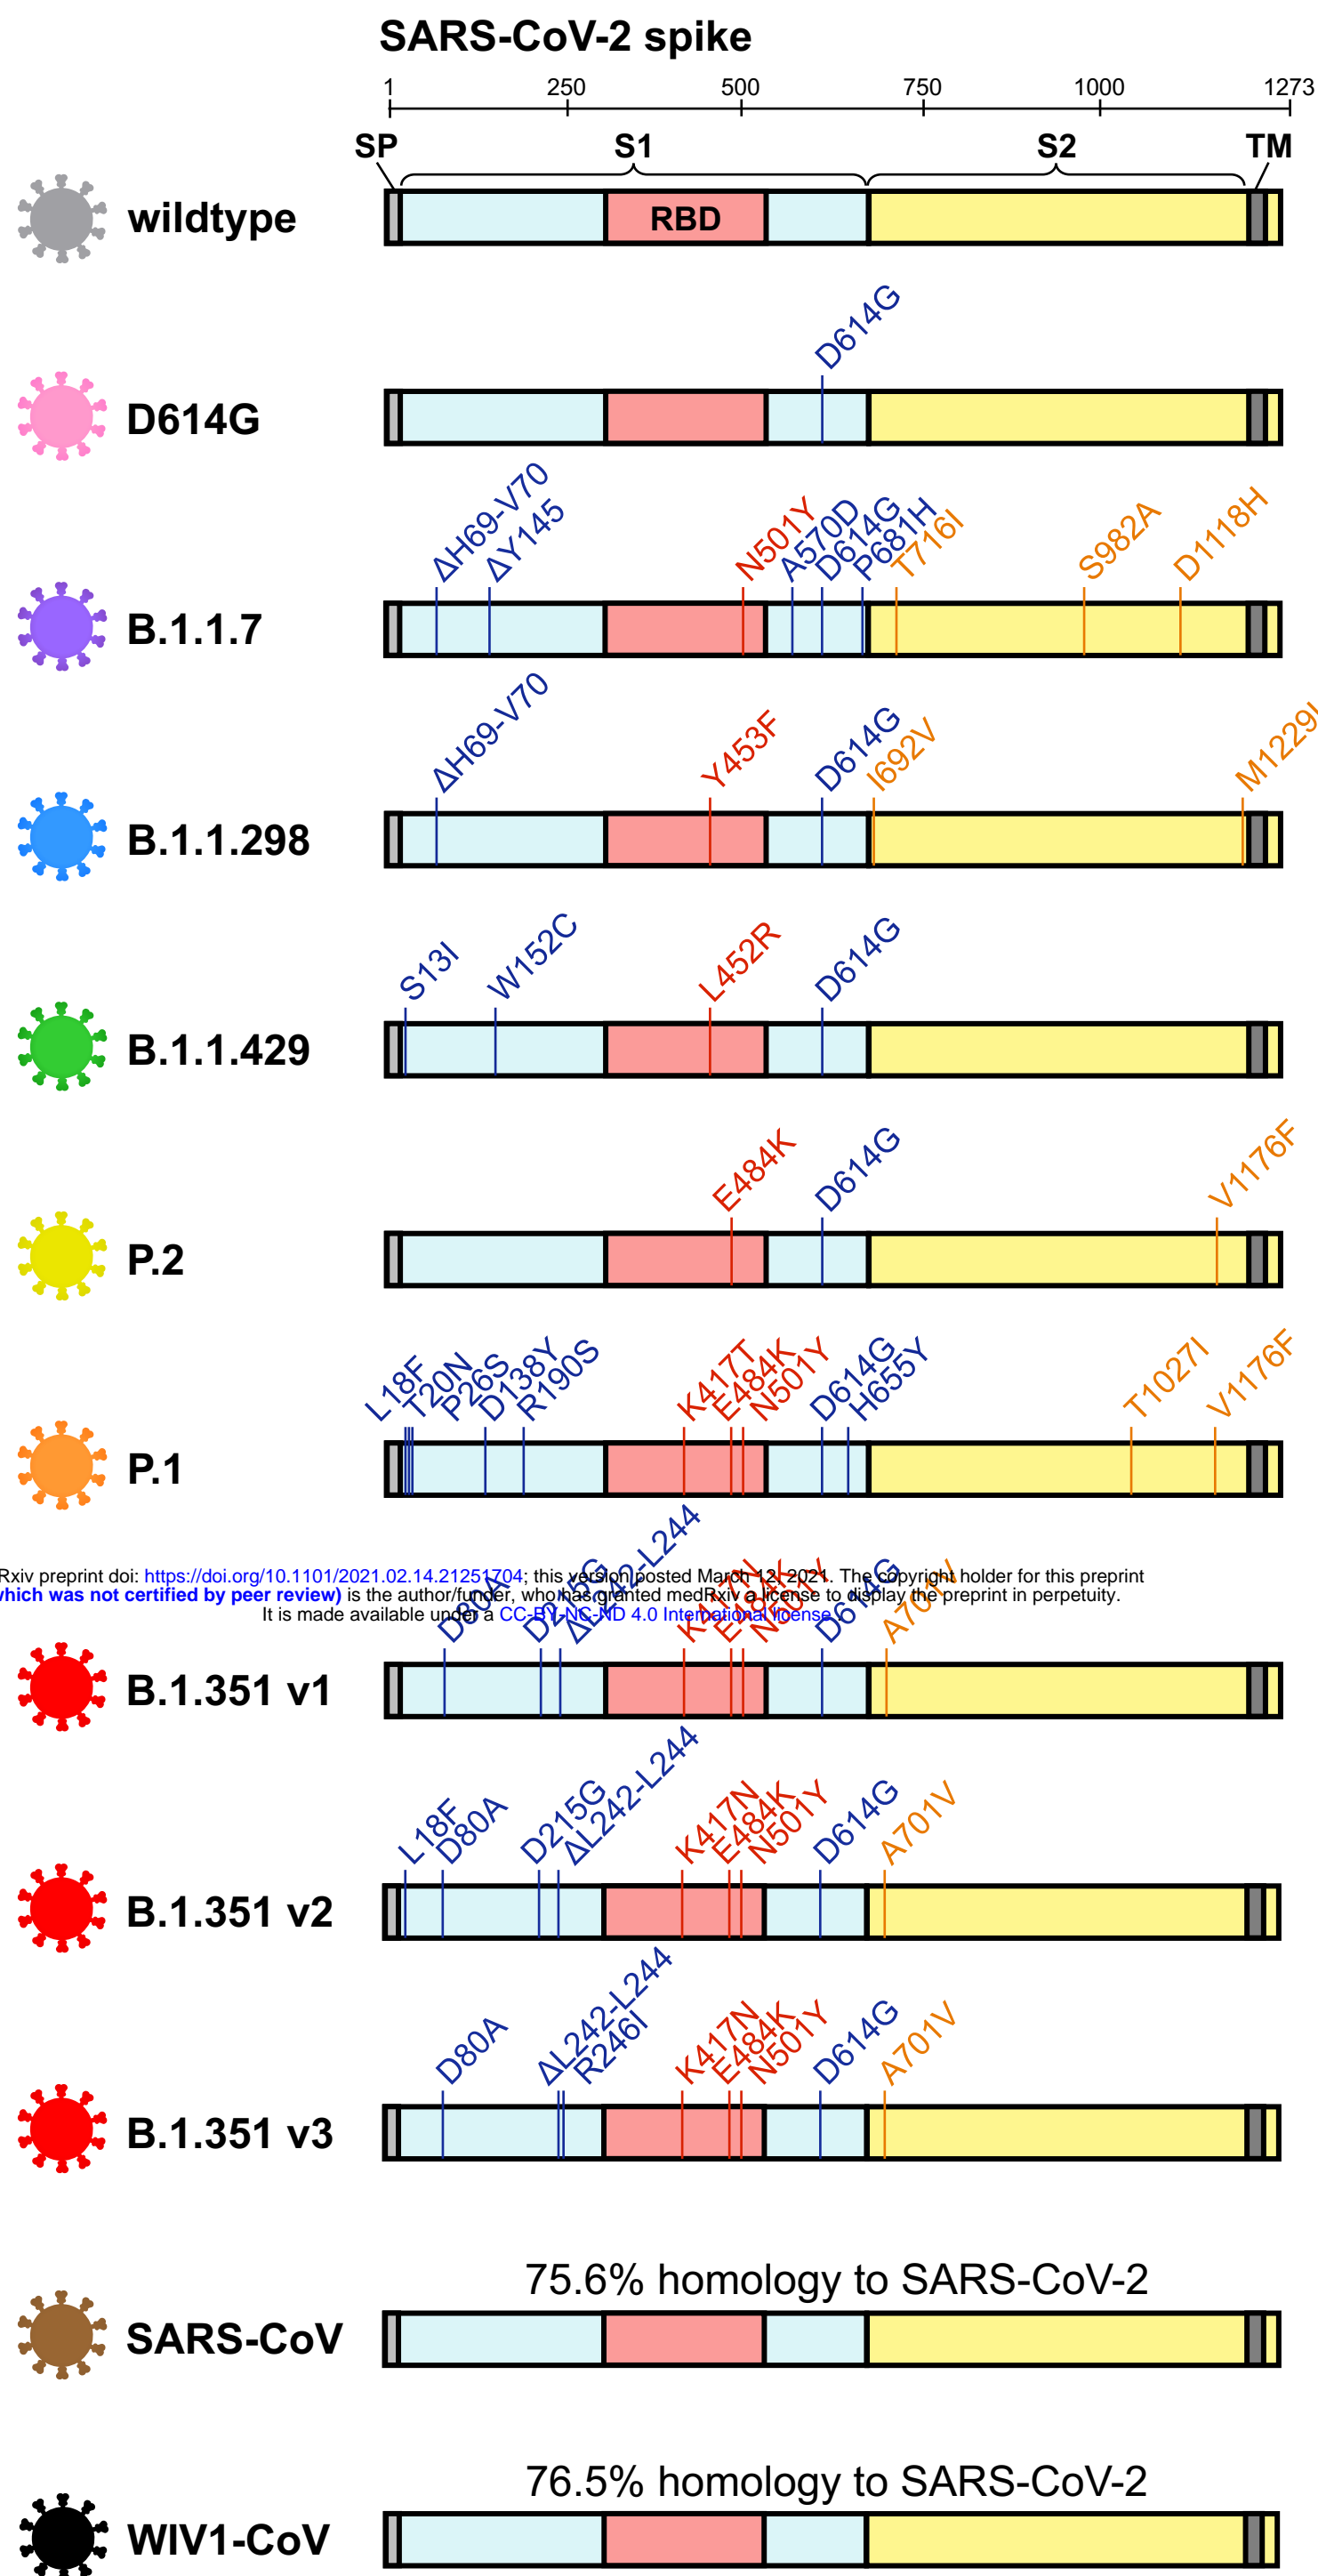

**Figure S2**

**BNT162b2 (Pfizer) vaccinees**

| Participant No. | Sex | Age range | No. of doses | Time since (days) |         |
|-----------------|-----|-----------|--------------|-------------------|---------|
|                 |     |           |              | Dose #1           | Dose #2 |
| 1               | F   | 60s       | x2           | 53                | 32      |
| 2               | F   | 20s       | x2           | 39                | 17      |
| 3               | F   | 20s       | x2           | 38                | 17      |
| 4               | M   | 30s       | x2           | 36                | 15      |
| 5               | M   | 30s       | x2           | 36                | 15      |
| 6               | F   | 30s       | x2           | 36                | 15      |
| 7               | F   | 30s       | x2           | 36                | 15      |
| 8               | M   | 30s       | x2           | 35                | 14      |
| 9               | M   | 40s       | x2           | 35                | 14      |
| 10              | M   | 30s       | x2           | 35                | 14      |
| 11              | F   | 30s       | x2           | 33                | 13      |
| 12              | M   | 30s       | x2           | 33                | 12      |
| 13              | F   | 40s       | x2           | 32                | 11      |
| 14              | F   | 30s       | x2           | 32                | 11      |
| 15              | F   | 30s       | x2           | 32                | 11      |
| 16              | F   | 20s       | x2           | 32                | 10      |
| 17              | F   | 30s       | x2           | 31                | 10      |
| 18              | F   | 30s       | x2           | 31                | 9       |
| 19              | F   | 30s       | x2           | 30                | 9       |
| 20              | M   | 30s       | x2           | 30                | 9       |
| 21              | M   | 30s       | x2           | 30                | 9       |
| 22              | F   | 20s       | x2           | 30                | 9       |
| 23              | M   | 30s       | x2           | 30                | 9       |
| 24              | F   | 30s       | x2           | 30                | 8       |
| ● 25            | M   | 20s       | x2           | 29                | 8       |
| 26              | M   | 30s       | x2           | 29                | 8       |
| 27              | M   | 30s       | x2           | 28                | 7       |
|                 | M   | 30s       | x1           | 20                | -       |
| 28              | F   | 30s       | x2           | 28                | 7       |
| 29              | F   | 30s       | x2           | 28                | 7       |
| 30              | F   | 20s       | x2           | 27                | 7       |
| 31              | F   | 50s       | x2*          | 28                | 5       |
| 32              | F   | 30s       | x2*          | 26                | 5       |
| 33              | M   | 20s       | x2*          | 26                | 5       |
| 34              | M   | 30s       | x2*          | 25                | 5       |
| 35              | F   | 30s       | x2*          | 27                | 4       |
| 36              | F   | 30s       | x2*          | 25                | 4       |
| 37              | F   | 20s       | x2*          | 23                | 2       |
| 38              | F   | 20s       | x2*          | 26                | 1       |
| 39              | M   | 30s       | x1           | 32                | -       |
| 40              | M   | 20s       | x1           | 22                | -       |
| 41              | F   | 20s       | x1           | 19                | -       |
| 42              | F   | 20s       | x1           | 12                | -       |
| 43              | M   | 60s       | x1           | 4                 | -       |

**mRNA-1273 (Moderna) vaccinees**

| Participant No. | Sex | Age range | No. of doses | Time since (days) |         |
|-----------------|-----|-----------|--------------|-------------------|---------|
|                 |     |           |              | Dose #1           | Dose #2 |
| 44              | M   | 30s       | x2           | 145               | 117     |
| 45              | F   | 60s       | x2           | 139               | 111     |
| 46              | M   | 20s       | x2           | 135               | 108     |
| 47              | M   | 20s       | x2           | 88                | 60      |
| 48              | F   | 20s       | x2           | 86                | 59      |
| 49              | F   | 50s       | x2           | 54                | 26      |
|                 | F   | 50s       | x1           | 26                | -       |
| 50              | F   | 50s       | x2           | 52                | 24      |
| 51              | F   | 40s       | x2           | 52                | 24      |
|                 | F   | 40s       | x1           | 29                | -       |
| 52              | F   | 20s       | x2           | 51                | 23      |
|                 | F   | 20s       | x1           | 23                | -       |
| 53              | M   | 30s       | x2           | 50                | 22      |
|                 | M   | 30s       | x1           | 22                | -       |
| 54              | M   | 50s       | x2           | 50                | 22      |
| 55              | M   | 50s       | x2           | 50                | 21      |
| 56              | F   | 30s       | x2           | 49                | 21      |
| 57              | F   | 50s       | x2           | 50                | 20      |
| 58              | F   | 60s       | x2           | 50                | 20      |
| 59              | F   | 40s       | x2           | 51                | 19      |
| 60              | F   | 40s       | x2           | 49                | 19      |
| 61              | F   | 50s       | x2           | 50                | 18      |
|                 | F   | 50s       | x1           | 22                | -       |
| 62              | F   | 60s       | x2           | 49                | 18      |
| 63              | F   | 50s       | x2           | 47                | 18      |
|                 | F   | 50s       | x1           | 19                | -       |
| 64              | F   | 60s       | x2           | 46                | 18      |
| 65              | F   | 40s       | x2           | 45                | 17      |
| 66              | F   | 70s       | x2           | 43                | 15      |
| 67              | M   | 30s       | x2           | 48                | 13      |
| 68              | F   | 60s       | x2           | 41                | 13      |
| 69              | F   | 50s       | x2           | 42                | 12      |
| 70              | M   | 20s       | x2           | 41                | 12      |
| 71              | F   | 50s       | x2           | 36                | 12      |
| ● 72            | F   | 30s       | x2           | 40                | 10      |
| 73              | M   | 40s       | x2           | 38                | 10      |
| 74              | F   | 60s       | x2           | 39                | 8       |
| 75              | F   | 60s       | x2           | 37                | 8       |
| 76              | M   | 20s       | x2           | 38                | 7       |
| 77              | F   | 60s       | x2           | 37                | 7       |
| 78              | F   | 20s       | x2           | 37                | 7       |
| 79              | F   | 60s       | x2*          | 34                | 6       |
| 80              | F   | 20s       | x2*          | 33                | 6       |
| 81              | M   | 50s       | x2*          | 18                | 5       |
| 82              | F   | 20s       | x2*          | 38                | 4       |
| 83              | M   | 20s       | x2*          | 35                | 4       |
| 84              | M   | 20s       | x2*          | 35                | 4       |
| 85              | M   | 30s       | x2*          | 35                | 4       |
| 86              | F   | 20s       | x2*          | 35                | 4       |
| 87              | M   | 30s       | x1           | 28                | -       |
| ● 88            | F   | 30s       | x1           | 27                | -       |
| 89              | F   | 30s       | x1           | 25                | -       |
| 90              | F   | 60s       | x1           | 24                | -       |
| 91              | F   | 20s       | x1           | 21                | -       |
| ● 92            | M   | 30s       | x1           | 20                | -       |
| 93              | M   | 40s       | x1           | 16                | -       |
| 94              | M   | 30s       | x1           | 14                | -       |
| 95              | M   | 30s       | x1           | 13                | -       |
| ● 96            | F   | 30s       | x1           | 12                | -       |
| ● 97            | M   | 20s       | x1           | 12                | -       |
| 98              | F   | 30s       | x1           | 11                | -       |
| 99              | F   | 20s       | x1           | 2                 | -       |

**Figure S2. Characteristics of vaccine recipients, related to Figure 2**

The sex and age range of 99 vaccine recipients are presented along with time (in days) after the first and, when applicable, second doses of either the BNT162b2 (*left panel*) or mRNA-1273 (*right panel*) vaccines. Individuals who reported having been diagnosed with or highly suspected to have COVID-19 before vaccination are highlighted with a red circle. For 7 out of the 99 vaccinees, two samples taken, one after the first dose and one after the second dose.

● indicates prior diagnosis or high suspicion of COVID-19

**Figure S3**

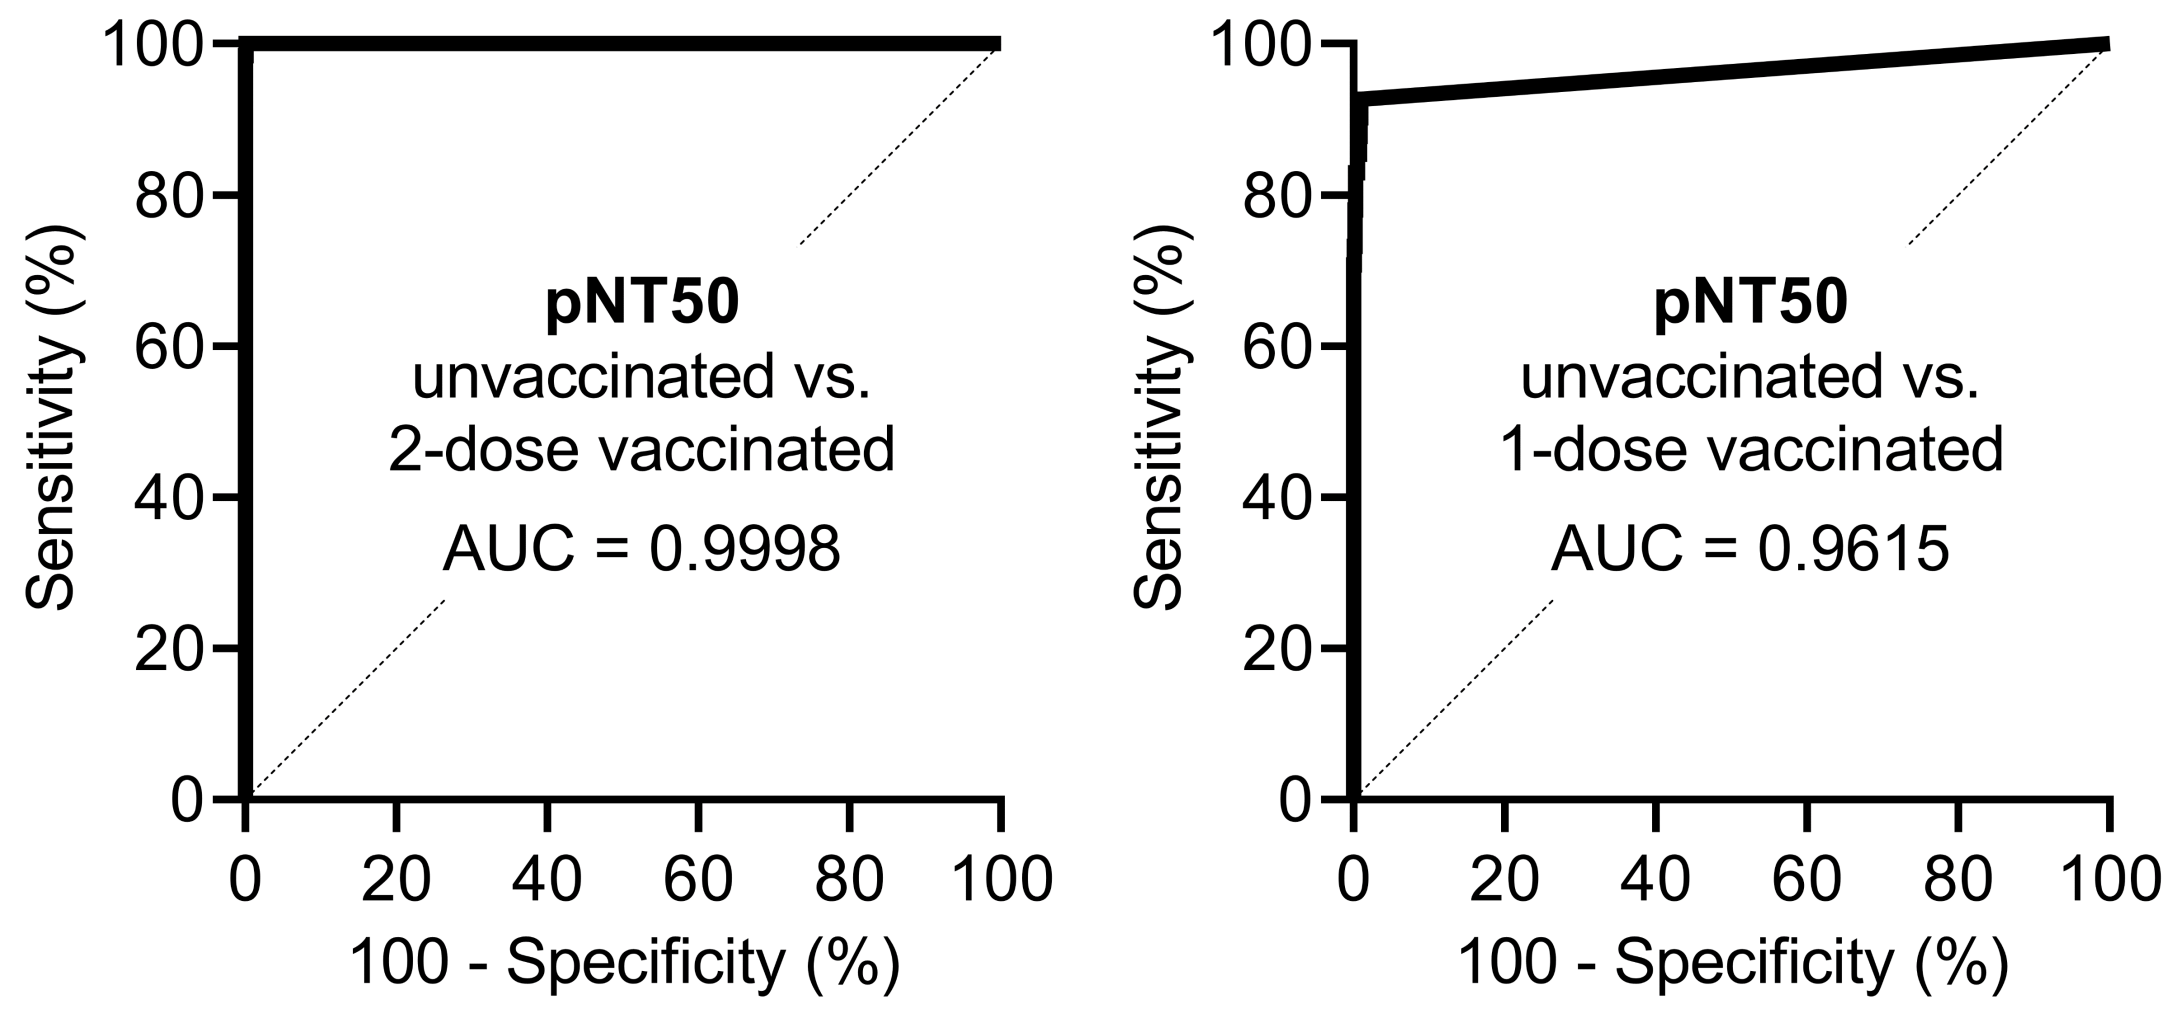

**Figure S4**

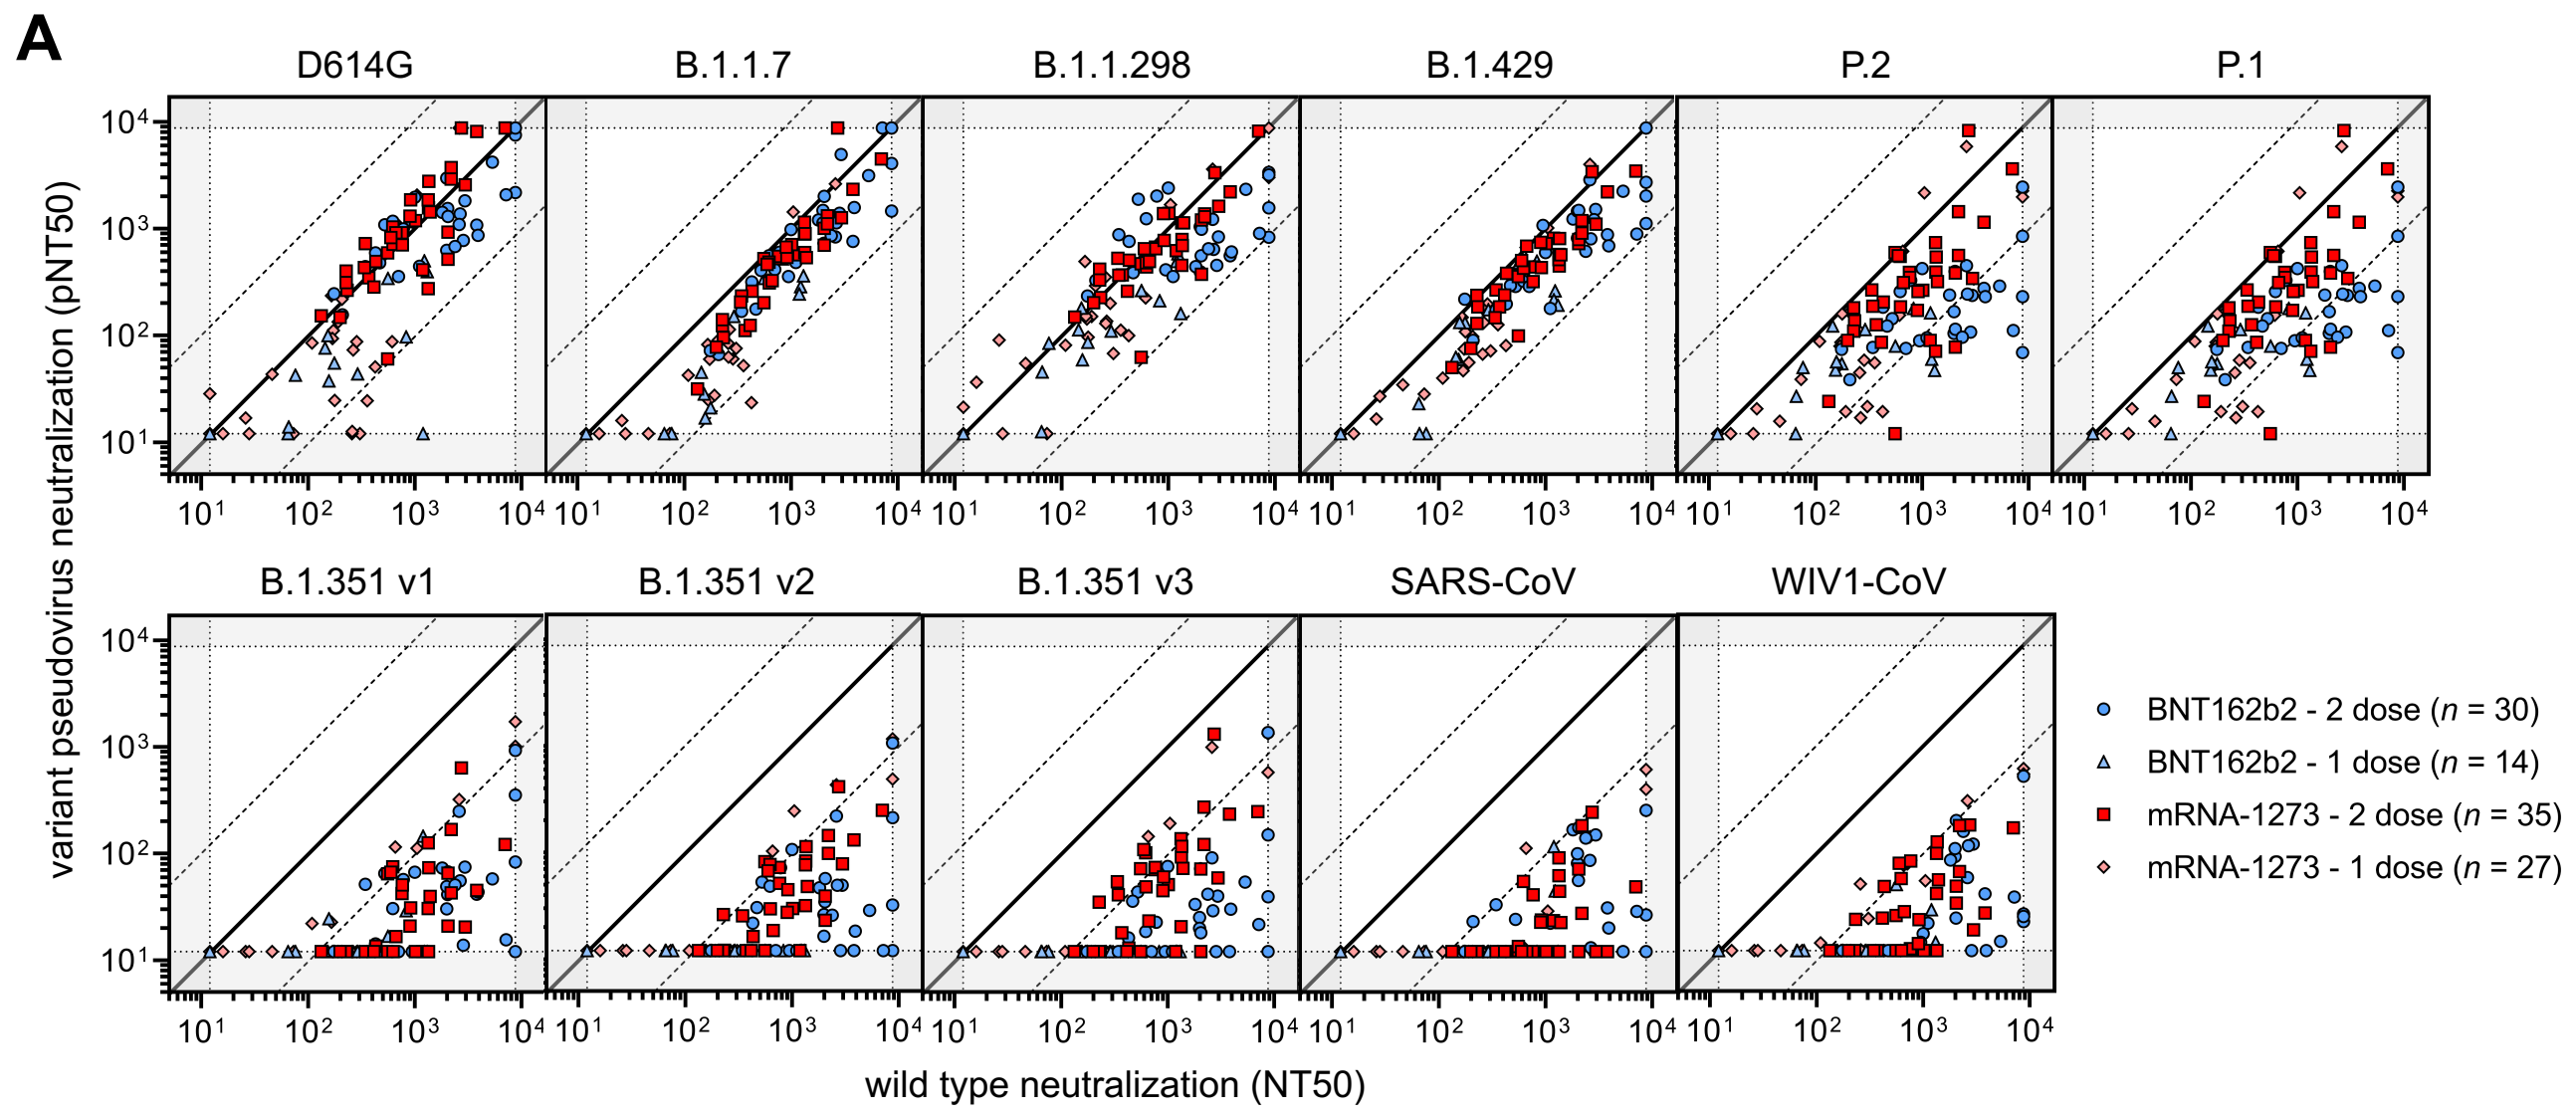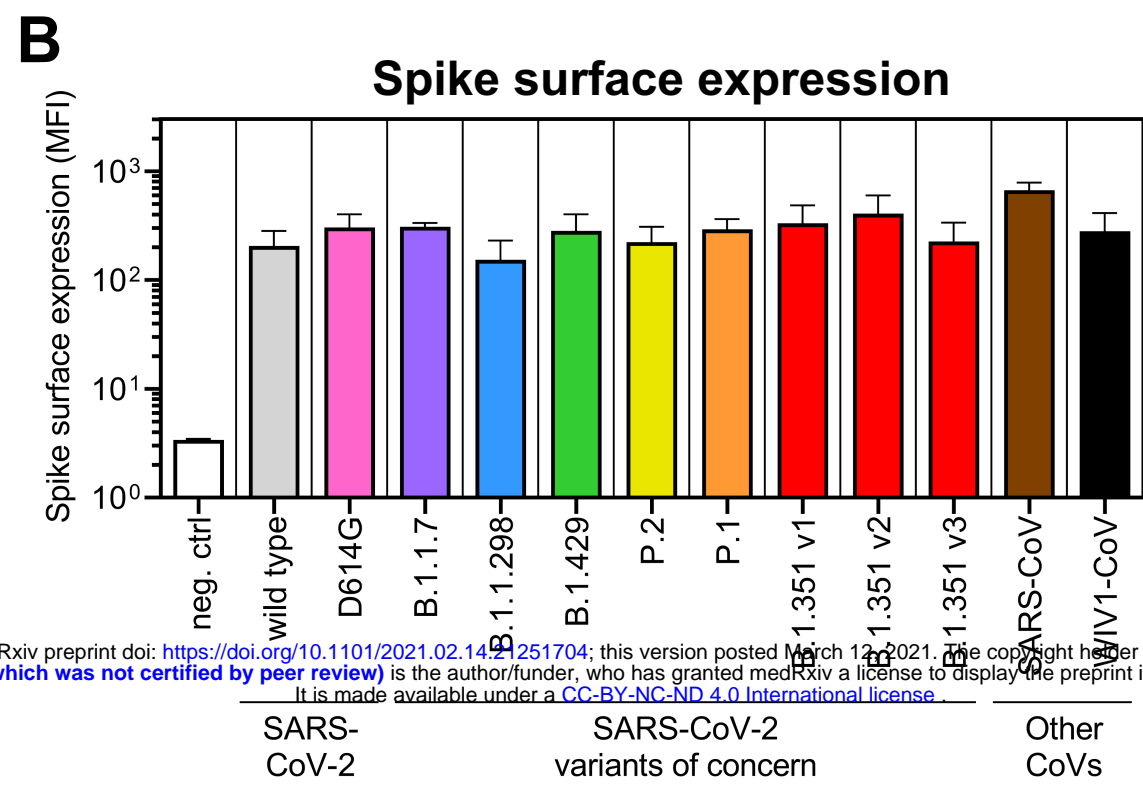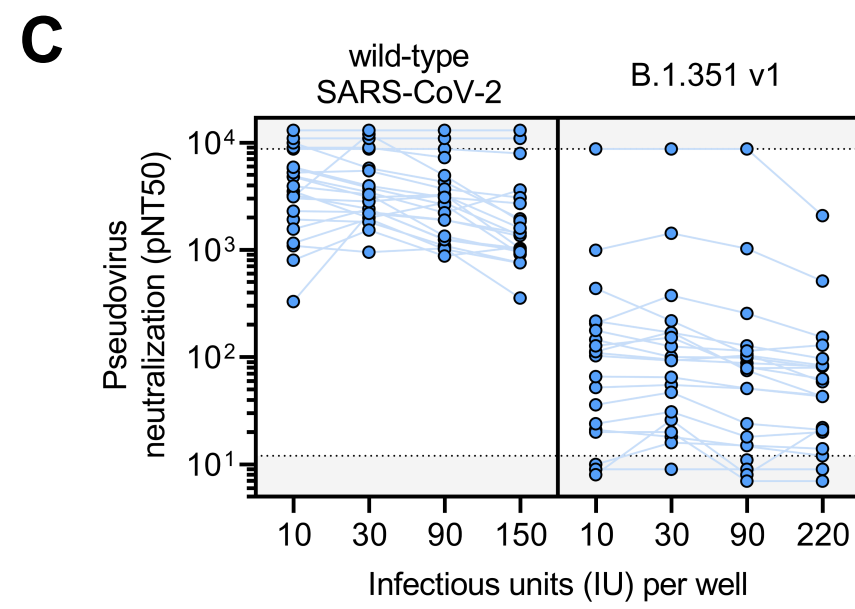

Supplement: NIHPP2021.02.14.21251704-supplement-1.pdf [file NIHPP2021.02.14.21251704-supplement-1.pdf]
